# Supplementary material for: Inequalities in ownership and availability of home-based vaccination records in 82 low- and middle-income countries
Source: bioRxiv or medRxiv preprint supplement (doi:10.1101/2024.01.16.24301369), 2024-01-17
Supplement: Supplementary file [file media-1.pdf]

## Supplementary materials

ST 1 – Surveys included in the analyses.

| ISO code | Country                   | Year | Source |
|----------|---------------------------|------|--------|
| AFG      | Afghanistan               | 2015 | DHS    |
| DZA      | Algeria                   | 2018 | MICS   |
| AGO      | Angola                    | 2015 | DHS    |
| ARM      | Armenia                   | 2015 | DHS    |
| BGD      | Bangladesh                | 2017 | DHS    |
| BLZ      | Belize                    | 2015 | MICS   |
| BEN      | Benin                     | 2017 | DHS    |
| BIH      | Bosnia and Herzegovina    | 2011 | MICS   |
| BFA      | Burkina Faso              | 2010 | DHS    |
| BDI      | Burundi                   | 2016 | DHS    |
| CAF      | CAR                       | 2018 | MICS   |
| KHM      | Cambodia                  | 2014 | DHS    |
| CMR      | Cameroon                  | 2018 | DHS    |
| TCD      | Chad                      | 2014 | DHS    |
| COL      | Colombia                  | 2010 | DHS    |
| COM      | Comoros                   | 2012 | DHS    |
| COG      | Congo Brazzaville         | 2014 | MICS   |
| COD      | Congo Democratic Republic | 2017 | MICS   |
| CRI      | Costa Rica                | 2018 | MICS   |
| CIV      | Cote d'Ivoire             | 2016 | MICS   |
| DOM      | Dominican Republic        | 2019 | MICS   |
| EGY      | Egypt                     | 2014 | DHS    |
| SLV      | El Salvador               | 2014 | MICS   |
| SWZ      | Eswatini                  | 2014 | MICS   |
| FJI      | Fiji                      | 2021 | MICS   |
| GAB      | Gabon                     | 2012 | DHS    |
| GMB      | Gambia                    | 2019 | DHS    |
| GHA      | Ghana                     | 2017 | MICS   |
| GTM      | Guatemala                 | 2014 | DHS    |
| GIN      | Guinea                    | 2018 | DHS    |
| GNB      | Guinea Bissau             | 2018 | MICS   |
| GUY      | Guyana                    | 2019 | MICS   |
| HTI      | Haiti                     | 2016 | DHS    |
| HND      | Honduras                  | 2019 | MICS   |
| IND      | India                     | 2019 | DHS    |
| IDN      | Indonesia                 | 2017 | DHS    |
| IRQ      | Iraq                      | 2018 | MICS   |
| JAM      | Jamaica                   | 2011 | MICS   |
| JOR      | Jordan                    | 2017 | DHS    |
| KEN      | Kenya                     | 2014 | DHS    |
| KIR      | Kiribati                  | 2018 | MICS   |
| XKX      | Kosovo                    | 2019 | MICS   |
| LAO      | Lao                       | 2017 | MICS   |

---

|     |                       |      |      |
|-----|-----------------------|------|------|
| LSO | Lesotho               | 2018 | MICS |
| LBR | Liberia               | 2019 | DHS  |
| MDG | Madagascar            | 2021 | DHS  |
| MWI | Malawi                | 2019 | MICS |
| MDV | Maldives              | 2016 | DHS  |
| MLI | Mali                  | 2018 | DHS  |
| MRT | Mauritania            | 2019 | DHS  |
| MEX | Mexico                | 2015 | MICS |
| MNE | Montenegro            | 2013 | MICS |
| MOZ | Mozambique            | 2015 | DHS  |
| MMR | Myanmar               | 2015 | DHS  |
| NAM | Namibia               | 2013 | DHS  |
| NPL | Nepal                 | 2019 | MICS |
| NER | Niger                 | 2021 | DHS  |
| NGA | Nigeria               | 2018 | DHS  |
| PAK | Pakistan              | 2017 | DHS  |
| PNG | Papua New Guinea      | 2016 | DHS  |
| PRY | Paraguay              | 2016 | MICS |
| PER | Peru                  | 2020 | DHS  |
| PHL | Philippines           | 2017 | DHS  |
| RWA | Rwanda                | 2019 | DHS  |
| WSM | Samoa                 | 2019 | MICS |
| STP | Sao Tome and Principe | 2019 | MICS |
| SEN | Senegal               | 2019 | DHS  |
| SLE | Sierra Leone          | 2019 | DHS  |
| ZAF | South Africa          | 2016 | DHS  |
| PSE | State of Palestine    | 2019 | MICS |
| TJK | Tajikistan            | 2017 | DHS  |
| TZA | Tanzania              | 2015 | DHS  |
| THA | Thailand              | 2019 | MICS |
| TLS | Timor Leste           | 2016 | DHS  |
| TGO | Togo                  | 2017 | MICS |
| TUN | Tunisia               | 2018 | MICS |
| TUR | Türkiye               | 2013 | DHS  |
| TUV | Tuvalu                | 2019 | MICS |
| UGA | Uganda                | 2016 | DHS  |
| YEM | Yemen                 | 2013 | DHS  |
| ZMB | Zambia                | 2018 | DHS  |
| ZWE | Zimbabwe              | 2019 | MICS |

---

ST 2 – Percentages of children aged 6-35 months according to home-based record ownership status stratified by age groups, wealth quintiles, mother’s education, area of residence, antenatal care and institutional delivery

| Group            | Level        | Card status            | % Children | 95% CI |       |
|------------------|--------------|------------------------|------------|--------|-------|
| All children     | 6-35 months  | Never had a card       | 10.2%      | 9.9%   | 10.5% |
| All children     | 6-35 months  | Card seen              | 67.8%      | 67.4%  | 68.2% |
| All children     | 6-35 months  | Has card, but not seen | 12.8%      | 12.5%  | 13.0% |
| All children     | 6-35 months  | No longer has a card   | 9.2%       | 9.0%   | 9.4%  |
| Age group        | 6-11 months  | Never had a card       | 9.5%       | 9.0%   | 9.9%  |
| Age group        | 6-11 months  | Card seen              | 76.3%      | 75.7%  | 76.9% |
| Age group        | 6-11 months  | Has card, but not seen | 9.1%       | 8.7%   | 9.5%  |
| Age group        | 6-11 months  | No longer has a card   | 5.2%       | 4.9%   | 5.5%  |
| Age group        | 12-23 months | Never had a card       | 9.7%       | 9.3%   | 10.1% |
| Age group        | 12-23 months | Card seen              | 69.9%      | 69.4%  | 70.4% |
| Age group        | 12-23 months | Has card, but not seen | 11.9%      | 11.6%  | 12.2% |
| Age group        | 12-23 months | No longer has a card   | 8.5%       | 8.2%   | 8.8%  |
| Age group        | 24-35 months | Never had a card       | 11.1%      | 10.7%  | 11.5% |
| Age group        | 24-35 months | Card seen              | 61.5%      | 60.9%  | 62.0% |
| Age group        | 24-35 months | Has card, but not seen | 15.5%      | 15.1%  | 15.8% |
| Age group        | 24-35 months | No longer has a card   | 12.0%      | 11.6%  | 12.3% |
| Sex              | Male         | Never had a card       | 10.0%      | 9.6%   | 10.3% |
| Sex              | Female       | Never had a card       | 10.5%      | 10.1%  | 10.8% |
| Sex              | Male         | Card seen              | 68.3%      | 67.8%  | 68.8% |
| Sex              | Female       | Card seen              | 67.3%      | 66.8%  | 67.8% |
| Sex              | Male         | Has card, but not seen | 12.7%      | 12.4%  | 13.0% |
| Sex              | Female       | Has card, but not seen | 12.8%      | 12.5%  | 13.2% |
| Sex              | Male         | No longer has a card   | 9.0%       | 8.7%   | 9.3%  |
| Sex              | Female       | No longer has a card   | 9.4%       | 9.1%   | 9.7%  |
| Wealth quintiles | Poorest      | Never had a card       | 17.1%      | 16.3%  | 17.9% |
| Wealth quintiles | Second       | Never had a card       | 12.4%      | 11.8%  | 13.0% |
| Wealth quintiles | Third        | Never had a card       | 9.4%       | 8.8%   | 10.0% |
| Wealth quintiles | Fourth       | Never had a card       | 6.1%       | 5.6%   | 6.6%  |
| Wealth quintiles | Wealthiest   | Never had a card       | 3.7%       | 3.4%   | 4.1%  |
| Wealth quintiles | Poorest      | Card seen              | 62.4%      | 61.6%  | 63.1% |
| Wealth quintiles | Second       | Card seen              | 67.1%      | 66.4%  | 67.8% |
| Wealth quintiles | Third        | Card seen              | 69.4%      | 68.7%  | 70.1% |
| Wealth quintiles | Fourth       | Card seen              | 70.8%      | 70.0%  | 71.7% |
| Wealth quintiles | Wealthiest   | Card seen              | 70.8%      | 70.0%  | 71.6% |
| Wealth quintiles | Poorest      | Has card, but not seen | 11.5%      | 11.1%  | 11.9% |
| Wealth quintiles | Second       | Has card, but not seen | 11.6%      | 11.2%  | 12.1% |
| Wealth quintiles | Third        | Has card, but not seen | 12.3%      | 11.8%  | 12.8% |
| Wealth quintiles | Fourth       | Has card, but not seen | 13.6%      | 13.0%  | 14.2% |
| Wealth quintiles | Wealthiest   | Has card, but not seen | 15.5%      | 14.9%  | 16.2% |
| Wealth quintiles | Poorest      | No longer has a card   | 9.1%       | 8.6%   | 9.5%  |

| Group                  | Level            | Card status            | % Children | 95% CI |       |
|------------------------|------------------|------------------------|------------|--------|-------|
| Wealth quintiles       | Second           | No longer has a card   | 8.9%       | 8.5%   | 9.3%  |
| Wealth quintiles       | Third            | No longer has a card   | 8.9%       | 8.5%   | 9.3%  |
| Wealth quintiles       | Fourth           | No longer has a card   | 9.5%       | 9.0%   | 10.0% |
| Wealth quintiles       | Wealthiest       | No longer has a card   | 9.9%       | 9.4%   | 10.5% |
| Mother's education     | None             | Never had a card       | 23.0%      | 22.1%  | 24.0% |
| Mother's education     | Primary          | Never had a card       | 10.7%      | 10.2%  | 11.2% |
| Mother's education     | Secondary+       | Never had a card       | 4.3%       | 4.1%   | 4.6%  |
| Mother's education     | None             | Card seen              | 55.7%      | 54.9%  | 56.6% |
| Mother's education     | Primary          | Card seen              | 67.2%      | 66.5%  | 67.9% |
| Mother's education     | Secondary+       | Card seen              | 73.4%      | 72.9%  | 73.9% |
| Mother's education     | None             | Has card, but not seen | 9.5%       | 9.1%   | 9.9%  |
| Mother's education     | Primary          | Has card, but not seen | 12.1%      | 11.7%  | 12.5% |
| Mother's education     | Secondary+       | Has card, but not seen | 14.5%      | 14.1%  | 14.8% |
| Mother's education     | None             | No longer has a card   | 11.7%      | 11.3%  | 12.2% |
| Mother's education     | Primary          | No longer has a card   | 10.0%      | 9.6%   | 10.4% |
| Mother's education     | Secondary+       | No longer has a card   | 7.8%       | 7.5%   | 8.1%  |
| Area of residence      | Urban            | Never had a card       | 6.3%       | 5.9%   | 6.7%  |
| Area of residence      | Rural            | Never had a card       | 12.4%      | 12.0%  | 12.9% |
| Area of residence      | Urban            | Card seen              | 68.3%      | 67.7%  | 69.0% |
| Area of residence      | Rural            | Card seen              | 67.5%      | 67.0%  | 68.0% |
| Area of residence      | Urban            | Has card, but not seen | 15.2%      | 14.8%  | 15.7% |
| Area of residence      | Rural            | Has card, but not seen | 11.3%      | 11.1%  | 11.6% |
| Area of residence      | Urban            | No longer has a card   | 10.1%      | 9.7%   | 10.5% |
| Area of residence      | Rural            | No longer has a card   | 8.7%       | 8.4%   | 9.0%  |
| Antenatal care         | 4+ visits        | Never had a card       | 4.7%       | 4.5%   | 5.0%  |
| Antenatal care         | <4 visits        | Never had a card       | 17.3%      | 16.7%  | 17.9% |
| Antenatal care         | 4+ visits        | Card seen              | 73.2%      | 72.8%  | 73.6% |
| Antenatal care         | <4 visits        | Card seen              | 63.1%      | 62.5%  | 63.8% |
| Antenatal care         | 4+ visits        | Has card, but not seen | 13.8%      | 13.5%  | 14.1% |
| Antenatal care         | <4 visits        | Has card, but not seen | 10.6%      | 10.2%  | 10.9% |
| Antenatal care         | 4+ visits        | No longer has a card   | 8.2%       | 8.0%   | 8.5%  |
| Antenatal care         | <4 visits        | No longer has a card   | 9.0%       | 8.7%   | 9.4%  |
| Institutional delivery | Institutional    | Never had a card       | 4.6%       | 4.4%   | 4.8%  |
| Institutional delivery | Noninstitutional | Never had a card       | 25.4%      | 24.6%  | 26.3% |
| Institutional delivery | Institutional    | Card seen              | 74.1%      | 73.7%  | 74.4% |
| Institutional delivery | Noninstitutional | Card seen              | 51.2%      | 50.4%  | 52.0% |
| Institutional delivery | Institutional    | Has card, but not seen | 13.2%      | 12.9%  | 13.4% |
| Institutional delivery | Noninstitutional | Has card, but not seen | 11.6%      | 11.2%  | 12.0% |
| Institutional delivery | Institutional    | No longer has a card   | 8.2%       | 7.9%   | 8.4%  |
| Institutional delivery | Noninstitutional | No longer has a card   | 11.8%      | 11.4%  | 12.3% |
| Age group              | 6-11 months      | Never had a card       | 12.9%      | 9.8%   | 16.8% |
| Age group              | 6-11 months      | Card seen              | 83.2%      | 79.5%  | 86.3% |
| Age group              | 6-11 months      | Has card, but not seen | 1.5%       | 1.0%   | 2.1%  |
| Age group              | 6-11 months      | No longer has a card   | 2.4%       | 1.3%   | 4.5%  |

| Group              | Level        | Card status            | % Children | 95% CI |       |
|--------------------|--------------|------------------------|------------|--------|-------|
| Age group          | 12-23 months | Never had a card       | 12.1%      | 9.4%   | 15.4% |
| Age group          | 12-23 months | Card seen              | 83.8%      | 80.0%  | 87.1% |
| Age group          | 12-23 months | Has card, but not seen | 2.0%       | 1.4%   | 2.8%  |
| Age group          | 12-23 months | No longer has a card   | 2.1%       | 1.2%   | 3.4%  |
| Age group          | 24-35 months | Never had a card       | 15.7%      | 12.6%  | 19.5% |
| Age group          | 24-35 months | Card seen              | 79.8%      | 75.6%  | 83.4% |
| Age group          | 24-35 months | Has card, but not seen | 2.1%       | 1.6%   | 2.8%  |
| Age group          | 24-35 months | No longer has a card   | 2.4%       | 1.5%   | 3.7%  |
| All children       | 6-35 months  | Never had a card       | 13.7%      | 11.5%  | 16.3% |
| All children       | 6-35 months  | Card seen              | 82.1%      | 79.2%  | 84.6% |
| All children       | 6-35 months  | Has card, but not seen | 1.9%       | 1.6%   | 2.4%  |
| All children       | 6-35 months  | No longer has a card   | 2.3%       | 1.6%   | 3.2%  |
| Sex                | Male         | Never had a card       | 12.6%      | 10.0%  | 15.7% |
| Sex                | Female       | Never had a card       | 14.9%      | 12.3%  | 18.0% |
| Sex                | Male         | Card seen              | 83.5%      | 80.2%  | 86.3% |
| Sex                | Female       | Card seen              | 80.6%      | 77.1%  | 83.7% |
| Sex                | Male         | Has card, but not seen | 1.9%       | 1.5%   | 2.5%  |
| Sex                | Female       | Has card, but not seen | 1.9%       | 1.4%   | 2.6%  |
| Sex                | Male         | No longer has a card   | 2.0%       | 1.2%   | 3.3%  |
| Sex                | Female       | No longer has a card   | 2.5%       | 1.7%   | 3.7%  |
| Wealth quintiles   | Poorest      | Never had a card       | 25.4%      | 21.2%  | 30.2% |
| Wealth quintiles   | Second       | Never had a card       | 14.9%      | 10.6%  | 20.5% |
| Wealth quintiles   | Third        | Never had a card       | 11.2%      | 8.0%   | 15.4% |
| Wealth quintiles   | Fourth       | Never had a card       | 9.4%       | 5.9%   | 14.5% |
| Wealth quintiles   | Wealthiest   | Never had a card       | 6.9%       | 4.1%   | 11.5% |
| Wealth quintiles   | Poorest      | Card seen              | 71.0%      | 65.6%  | 75.8% |
| Wealth quintiles   | Second       | Card seen              | 81.9%      | 76.6%  | 86.2% |
| Wealth quintiles   | Third        | Card seen              | 85.1%      | 80.6%  | 88.8% |
| Wealth quintiles   | Fourth       | Card seen              | 85.8%      | 81.2%  | 89.5% |
| Wealth quintiles   | Wealthiest   | Card seen              | 87.3%      | 81.6%  | 91.5% |
| Wealth quintiles   | Poorest      | Has card, but not seen | 1.9%       | 1.2%   | 3.0%  |
| Wealth quintiles   | Second       | Has card, but not seen | 1.6%       | 1.0%   | 2.5%  |
| Wealth quintiles   | Third        | Has card, but not seen | 1.7%       | 1.0%   | 2.8%  |
| Wealth quintiles   | Fourth       | Has card, but not seen | 1.8%       | 1.2%   | 2.6%  |
| Wealth quintiles   | Wealthiest   | Has card, but not seen | 2.7%       | 1.9%   | 3.6%  |
| Wealth quintiles   | Poorest      | No longer has a card   | 1.7%       | 0.9%   | 3.2%  |
| Wealth quintiles   | Second       | No longer has a card   | 1.6%       | 0.9%   | 3.0%  |
| Wealth quintiles   | Third        | No longer has a card   | 2.0%       | 1.1%   | 3.7%  |
| Wealth quintiles   | Fourth       | No longer has a card   | 3.0%       | 1.6%   | 5.4%  |
| Wealth quintiles   | Wealthiest   | No longer has a card   | 3.1%       | 1.8%   | 5.3%  |
| Mother's education | None         | Never had a card       | 33.7%      | 28.2%  | 39.7% |
| Mother's education | Primary      | Never had a card       | 17.3%      | 13.2%  | 22.4% |
| Mother's education | Secondary+   | Never had a card       | 1.6%       | 1.0%   | 2.6%  |
| Mother's education | None         | Card seen              | 62.4%      | 56.6%  | 67.9% |

| Group                  | Level            | Card status            | % Children | 95% CI |       |
|------------------------|------------------|------------------------|------------|--------|-------|
| Mother's education     | Primary          | Card seen              | 77.6%      | 71.7%  | 82.6% |
| Mother's education     | Secondary+       | Card seen              | 94.4%      | 93.3%  | 95.3% |
| Mother's education     | None             | Has card, but not seen | 0.5%       | 0.2%   | 1.1%  |
| Mother's education     | Primary          | Has card, but not seen | 0.8%       | 0.3%   | 2.2%  |
| Mother's education     | Secondary+       | Has card, but not seen | 3.2%       | 2.6%   | 3.8%  |
| Mother's education     | None             | No longer has a card   | 3.4%       | 1.8%   | 6.3%  |
| Mother's education     | Primary          | No longer has a card   | 4.2%       | 2.6%   | 6.7%  |
| Mother's education     | Secondary+       | No longer has a card   | 0.8%       | 0.4%   | 1.6%  |
| Area of residence      | Urban            | Never had a card       | 8.7%       | 5.5%   | 13.3% |
| Area of residence      | Rural            | Never had a card       | 16.3%      | 13.4%  | 19.7% |
| Area of residence      | Urban            | Card seen              | 85.4%      | 80.2%  | 89.4% |
| Area of residence      | Rural            | Card seen              | 80.4%      | 76.8%  | 83.6% |
| Area of residence      | Urban            | Has card, but not seen | 3.2%       | 2.6%   | 4.0%  |
| Area of residence      | Rural            | Has card, but not seen | 1.3%       | 0.9%   | 1.8%  |
| Area of residence      | Urban            | No longer has a card   | 2.8%       | 1.6%   | 4.9%  |
| Area of residence      | Rural            | No longer has a card   | 2.0%       | 1.3%   | 3.0%  |
| Antenatal care         | 4+ visits        | Never had a card       | 4.1%       | 2.8%   | 5.9%  |
| Antenatal care         | <4 visits        | Never had a card       | 32.1%      | 27.2%  | 37.4% |
| Antenatal care         | 4+ visits        | Card seen              | 91.4%      | 88.9%  | 93.4% |
| Antenatal care         | <4 visits        | Card seen              | 64.5%      | 59.1%  | 69.5% |
| Antenatal care         | 4+ visits        | Has card, but not seen | 2.1%       | 1.5%   | 2.8%  |
| Antenatal care         | <4 visits        | Has card, but not seen | 0.7%       | 0.3%   | 1.4%  |
| Antenatal care         | 4+ visits        | No longer has a card   | 2.4%       | 1.5%   | 4.0%  |
| Antenatal care         | <4 visits        | No longer has a card   | 2.8%       | 1.7%   | 4.6%  |
| Institutional delivery | Institutional    | Never had a card       | 5.8%       | 4.2%   | 7.9%  |
| Institutional delivery | Noninstitutional | Never had a card       | 39.2%      | 33.8%  | 44.9% |
| Institutional delivery | Institutional    | Card seen              | 90.4%      | 88.0%  | 92.3% |
| Institutional delivery | Noninstitutional | Card seen              | 56.0%      | 49.7%  | 62.2% |
| Institutional delivery | Institutional    | Has card, but not seen | 1.8%       | 1.4%   | 2.3%  |
| Institutional delivery | Noninstitutional | Has card, but not seen | 0.9%       | 0.4%   | 2.1%  |
| Institutional delivery | Institutional    | No longer has a card   | 2.1%       | 1.3%   | 3.4%  |
| Institutional delivery | Noninstitutional | No longer has a card   | 3.9%       | 2.5%   | 6.0%  |

ST 3 – Immunization coverage among children aged 12-23 months according to home-based record ownership status.

| <b>Vaccine</b>    | <b>HBR status</b>      | <b>Coverage</b> | <b>95% CI</b> |       |
|-------------------|------------------------|-----------------|---------------|-------|
| BCG               | Never had a card       | 33.0%           | 31.5%         | 34.6% |
| BCG               | Card seen              | 97.5%           | 97.4%         | 97.7% |
| BCG               | Has card, but not seen | 87.6%           | 86.6%         | 88.5% |
| BCG               | No longer has a card   | 89.8%           | 88.9%         | 90.6% |
| POLIO 3           | Never had a card       | 22.2%           | 20.7%         | 23.9% |
| POLIO 3           | Card seen              | 89.7%           | 89.4%         | 90.0% |
| POLIO 3           | Has card, but not seen | 45.8%           | 44.4%         | 47.2% |
| POLIO 3           | No longer has a card   | 39.9%           | 38.0%         | 41.9% |
| DPT 3             | Never had a card       | 15.0%           | 13.9%         | 16.2% |
| DPT 3             | Card seen              | 90.5%           | 90.2%         | 90.8% |
| DPT 3             | Has card, but not seen | 63.4%           | 62.0%         | 64.7% |
| DPT 3             | No longer has a card   | 57.6%           | 55.8%         | 59.4% |
| DPT 1             | Never had a card       | 28.7%           | 27.2%         | 30.2% |
| DPT 1             | Card seen              | 97.2%           | 97.0%         | 97.3% |
| DPT 1             | Has card, but not seen | 84.1%           | 83.1%         | 85.0% |
| DPT 1             | No longer has a card   | 84.5%           | 83.3%         | 85.6% |
| MCV               | Never had a card       | 26.3%           | 24.9%         | 27.7% |
| MCV               | Card seen              | 80.3%           | 79.8%         | 80.7% |
| MCV               | Has card, but not seen | 73.6%           | 72.4%         | 74.8% |
| MCV               | No longer has a card   | 72.7%           | 71.1%         | 74.1% |
| FULL              | Never had a card       | 6.1%            | 5.5%          | 6.8%  |
| FULL              | Card seen              | 75.5%           | 75.1%         | 75.9% |
| FULL              | Has card, but not seen | 37.4%           | 36.1%         | 38.8% |
| FULL              | No longer has a card   | 27.0%           | 25.3%         | 28.7% |
| DPT dropout ratio | Never had a card       | 47.6%           | 44.7%         | 50.6% |
| DPT dropout ratio | Card seen              | 6.9%            | 6.6%          | 7.1%  |
| DPT dropout ratio | Has card, but not seen | 24.7%           | 23.3%         | 26.0% |
| DPT dropout ratio | No longer has a card   | 31.9%           | 30.0%         | 33.8% |

Legend: HBR – home-based record; BCG – Bacille Calmette-Guérin; DPT – diphtheria-pertussis-tetanus; MCV – measles containing vaccine; FULL – full immunization coverage (BCG + DPT3 + Polio3 + MCV)

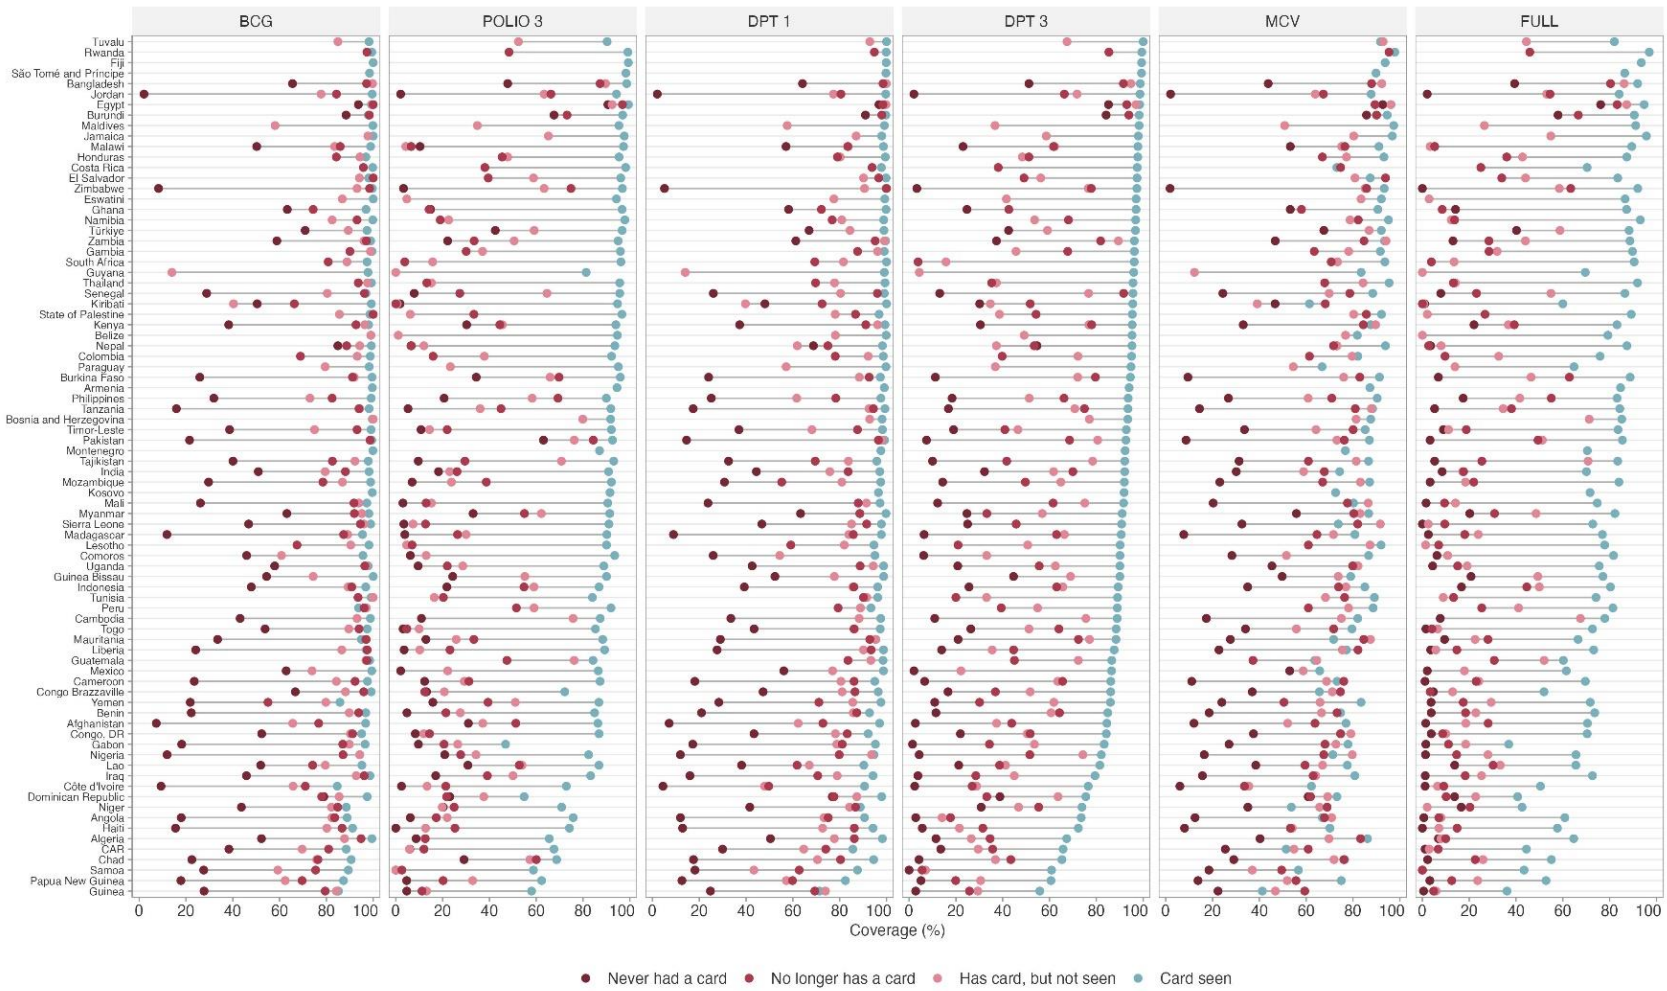

SF 1 – Immunization coverage among children aged 12-23 months according to home-based record ownership status by country. Countries ordered according to DPT3 coverage.
